# Supplementary material for: Chemical Composition Variation in Essential Oil and Their Correlation with Climate Factors in Chinese Prickly Ash Peels (Zanthoxylum armatum DC.) from Different Habitats
Source: MDPI journal article supplement (doi:10.3390/molecules29061343), 2024-03-18
Supplement: s1 [file s1]

Table S1 Sample source information of *Zanthoxylum armatum* DC

| Sample Code | Place of origin (province, city/state, county/district) | Longitude (°) | Latitude (°) | Altitude (m) | Age of tree (year) |
|-------------|---------------------------------------------------------|---------------|--------------|--------------|--------------------|
| Z1          | Sichuan, Ya'an, Tianquan                                | 102.9         | 30.0         | 726          | 4                  |
| Z2          | Sichuan, Ya'an, Yucheng District                        | 103.1         | 30.0         | 610          | 4                  |
| Z3          | Yunnan, Zhaotong, Yanshan                               | 103.2         | 27.5         | 2015         | 9                  |
| Z4          | Sichuan, Liangshan, Jinyang                             | 103.3         | 27.7         | 2050         | 7                  |
| Z5          | Sichuan, Meishan, Hongya                                | 103.3         | 29.9         | 933          | 5                  |
| Z6          | Sichuan, Meishan, Renshou                               | 104.2         | 30.0         | 402          | 5                  |
| Z7          | Sichuan, Chengdu, Jintang                               | 104.5         | 30.8         | 448          | 4                  |
| Z8          | Sichuan, Zigong, Yantan District                        | 104.8         | 29.2         | 385          | 4                  |
| Z9          | Sichuan, Mianyang, Santai                               | 104.9         | 31.3         | 434          | 4                  |
| Z10         | Sichuan, Zigong, Yantan District                        | 105.0         | 29.3         | 322          | 4                  |
| Z11         | Sichuan, Zigong, Fushun                                 | 105.2         | 29.0         | 281          | 4                  |
| Z12         | Sichuan, Guangyuan, Zhaohua District                    | 105.6         | 32.2         | 660          | 4                  |
| Z13         | Guizhou, Qianxinan, Zhenfeng                            | 105.6         | 25.6         | 628          | 7                  |
| Z14         | Guizhou, Qianxinan, Zhenfeng                            | 105.7         | 25.7         | 614          | 7                  |
| Z15         | Chongqing, Jiangjin                                     | 106.2         | 29.1         | 311          | 6                  |
| Z16         | Chongqing, Jiangjin                                     | 106.3         | 29.2         | 315          | 6                  |
| Z17         | Sichuan, Guang'an, Yuechi                               | 106.5         | 30.6         | 436          | 4                  |
| Z18         | Sichuan, Guang'an, Yuechi                               | 106.5         | 30.7         | 389          | 4                  |
| Z19         | Sichuan, Guang'an, Qianfeng District                    | 106.6         | 30.5         | 683          | 4                  |
| Z20         | Sichuan, Dazhou, Quxian                                 | 106.8         | 30.9         | 338          | 5                  |
| Z21         | Sichuan, Bazhong, Pingchang                             | 107.0         | 31.4         | 618          | 5                  |
| Z22         | Sichuan, Bazhong, Pingchang                             | 107.1         | 31.4         | 385          | 5                  |
| Z23         | Sichuan, Bazhong, Pingchang                             | 107.3         | 31.7         | 663          | 5                  |
| Z24         | Sichuan, Bazhong, Pingchang                             | 107.4         | 31.8         | 432          | 5                  |

Note: *Z. armatum* samples are live seedlings.
