# Supplementary material for: Chemical Composition Variation in Essential Oil and Their Correlation with Climate Factors in Chinese Prickly Ash Peels (Zanthoxylum armatum DC.) from Different Habitats
Source: MDPI journal article supplement (doi:10.3390/molecules29061343), 2024-03-18
Supplement: s1 [file s1]

Table S2 Volatile components in *Zanthoxylum armatum* DC. adetected by GC/MS

| Num<br>ber | Compound name                                            | Molec<br>ular<br>formul<br>a    | Retent<br>ion<br>index<br>(RI) | Odor<br>thresh<br>old<br>μg/kg | Odor<br>characteris<br>tics   | Relative content/% |     |     |     |     |     |     |     |     |     |     |     |     |     |     |     |     |     |     |     |     |     |     |     |    |  |  |  |
|------------|----------------------------------------------------------|---------------------------------|--------------------------------|--------------------------------|-------------------------------|--------------------|-----|-----|-----|-----|-----|-----|-----|-----|-----|-----|-----|-----|-----|-----|-----|-----|-----|-----|-----|-----|-----|-----|-----|----|--|--|--|
|            |                                                          |                                 |                                |                                |                               | Z1                 | Z2  | Z3  | Z4  | Z5  | Z6  | Z7  | Z8  | Z9  | Z1  | Z2  | Z2  | Z2  | Z2  | Z2 |  |  |  |
|            |                                                          |                                 |                                |                                |                               | 0                  | 1   | 2   | 3   | 4   | 5   | 6   | 7   | 8   | 9   | 0   | 1   | 2   | 3   | 4   | 5   | 6   | 7   | 8   | 9   | 0   | 1   | 2   | 3   | 4  |  |  |  |
|            | Terpene                                                  |                                 |                                |                                |                               |                    |     |     |     |     |     |     |     |     |     |     |     |     |     |     |     |     |     |     |     |     |     |     |     |    |  |  |  |
|            | 3-<br>Thujene                                            | C <sub>10</sub> H <sub>16</sub> | 852                            |                                |                               | —                  | —   | —   | 0.6 | 0.6 | —   | 0.5 | 0.4 | 0.5 | —   | 0.3 | 0.4 | 0.4 | 0.5 | —   | —   | 0.2 | —   | 0.4 | 0.3 | 0.3 | 0.2 | 0.4 | —   |    |  |  |  |
| 2          | β-Thujene                                                | C <sub>10</sub> H <sub>16</sub> | 852                            |                                |                               | 10.<br>28          | 7.4 | 0.7 | 7.5 | —   | 0.4 | 7.2 | 4.7 | 8.6 | 0.3 | —   | 6.0 | 9.3 | 5.1 | —   | —   | 2.1 | 0.3 | 4.7 | 4.7 | 5.3 | 8.5 | 3.4 | 0.3 |    |  |  |  |
|            |                                                          |                                 |                                |                                |                               |                    | 8   | 2   | 2   |     | 8   | 5   | 7   | 1   | 9   |     | 8   | 9   | 4   |     |     | 4   | 3   | 4   | 2   | 1   | 3   | 7   | 2   |    |  |  |  |
| 3          | Cyclofeuchene                                            | C <sub>10</sub> H <sub>16</sub> | 854                            |                                |                               | —                  | —   | —   | —   | —   | —   | —   | —   | —   | 0.3 | 0.3 | —   | —   | —   | —   | —   | —   | —   | —   | —   | —   | —   | —   | —   |    |  |  |  |
|            |                                                          |                                 |                                |                                |                               |                    |     |     |     |     |     |     |     |     | 2   | 1   |     |     |     |     |     |     |     |     |     |     |     |     |     |    |  |  |  |
| 4          | (1S)-(-)-alpha-<br>Pinene                                | C <sub>10</sub> H <sub>16</sub> | 854                            |                                |                               | —                  | —   | —   | —   | —   | 0.5 | 0.8 | —   | —   | —   | —   | 0.4 | —   | —   | —   | —   | —   | —   | —   | —   | —   | 0.4 | —   | —   |    |  |  |  |
|            |                                                          |                                 |                                |                                |                               |                    |     |     |     |     | 5   | 0   |     |     |     |     | 4   |     |     |     |     |     |     |     |     | 9   |     |     |     |    |  |  |  |
| 5          | α-Pinene                                                 | C <sub>10</sub> H <sub>16</sub> | 854                            | 2100                           | Terpene-<br>like and<br>minty | —                  | —   | —   | —   | —   | —   | —   | —   | —   | —   | —   | —   | —   | —   | —   | —   | 0.1 | —   | —   | —   | —   | —   | —   | —   |    |  |  |  |
|            |                                                          |                                 |                                |                                |                               |                    |     |     |     |     |     |     |     |     |     |     |     |     |     |     | 8   |     |     |     |     |     |     |     |     |    |  |  |  |
| 6          | (1r)-(+)- alpha-<br>pinene                               | C <sub>10</sub> H <sub>16</sub> | 855                            |                                |                               | —                  | 0.5 | 0.7 | 0.6 | —   | —   | —   | 0.4 | 0.3 | —   | —   | —   | 0.6 | —   | 0.5 | 0.2 | —   | 0.2 | 0.5 | 0.3 | 0.5 | —   | 0.4 | 0.3 |    |  |  |  |
|            |                                                          |                                 |                                |                                |                               |                    | 3   | 8   | 6   |     |     |     | 5   | 6   |     |     |     | 9   |     | 3   | 5   |     | 7   | 0   | 3   | 8   |     | 0   | 2   |    |  |  |  |
| 7          | 1,7,7- Trimethyl-<br>tricyclo [2.2.1.<br>0(2,6)] heptane | C <sub>10</sub> H <sub>16</sub> | 855                            |                                |                               | 0.3                | —   | —   | —   | —   | —   | —   | —   | —   | —   | —   | —   | —   | —   | —   | —   | —   | —   | —   | —   | —   | —   | —   | —   |    |  |  |  |
|            |                                                          |                                 |                                |                                |                               | 4                  |     |     |     |     |     |     |     |     |     |     |     |     |     |     |     |     |     |     |     |     |     |     |     |    |  |  |  |
| 8          | Sabenene                                                 | C <sub>10</sub> H <sub>16</sub> | 880                            |                                |                               | —                  | 5.0 | —   | 4.9 | 11. | 3.5 | —   | —   | —   | —   | 6.7 | 3.5 | —   | 3.3 | —   | 2.7 | 3.1 | 3.2 | 4.6 | 3.2 | —   | —   | 4.9 | 3.7 |    |  |  |  |
|            |                                                          |                                 |                                |                                |                               |                    | 0   |     | 6   | 17  | 0   |     |     |     |     | 6   | 7   |     | 9   |     | 1   | 9   | 0   | 1   | 0   |     |     | 4   | 8   |    |  |  |  |

|    |                         |                                 |      |     |            |     |     |     |     |     |     |     |     |     |     |     |     |     |     |     |     |     |     |     |     |     |     |     |     |
|----|-------------------------|---------------------------------|------|-----|------------|-----|-----|-----|-----|-----|-----|-----|-----|-----|-----|-----|-----|-----|-----|-----|-----|-----|-----|-----|-----|-----|-----|-----|-----|
| 9  | $\beta$ -Humulene       | C <sub>15</sub> H <sub>24</sub> | 891  |     |            | 0.9 | 3.1 | 2.2 | 2.7 | 5.9 | 2.8 | 4.7 | 2.6 | 3.2 | 3.0 | 2.6 | 4.1 | —   | 0.8 | 3.4 | 2.6 | 2.2 | 2.2 | 3.4 | 2.0 | 3.1 | 2.8 | 2.8 | 2.2 |
|    |                         |                                 |      |     |            | 7   | 3   | 9   | 4   | 4   | 2   | 5   | 5   | 7   | 2   | 0   | 4   |     | 4   | 0   | 5   | 5   | 2   | 0   | 7   | 0   | 3   | 8   | 5   |
| 10 | $\beta$ -Phellandrene   | C <sub>10</sub> H <sub>16</sub> | 892  |     |            | —   | 1.6 | 9.3 | —   | —   | 5.4 | 6.8 | 3.0 | —   | 7.6 | —   | —   | 4.6 | —   | 7.3 | 1.7 | 0.6 | 1.9 | —   | —   | 3.7 | —   | —   | 3.8 |
|    |                         |                                 |      |     |            |     | 6   | 5   |     |     | 2   | 3   | 2   |     | 2   |     |     | 0   |     | 9   | 8   | 6   | 4   |     |     | 7   |     | 4   |     |
| 11 | $\alpha$ -Phellandrene  | C <sub>10</sub> H <sub>16</sub> | 1001 | 700 | With weed  | 0.2 | 0.2 | 0.2 | 0.2 | 0.4 | 0.2 | —   | 0.2 | 0.2 | 0.1 | 0.3 | 0.1 | 0.2 | 0.0 | 0.3 | —   | —   | —   | 0.3 | 0.2 | 0.3 | 0.3 | 0.2 | 0.4 |
|    |                         |                                 |      |     | herbaceou  | 0   | 2   | 2   | 4   | 3   | 4   |     | 7   | 5   | 6   | 2   | 9   | 1   | 8   | 2   |     |     |     | 0   | 6   | 0   | 3   | 9   | 0   |
|    |                         |                                 |      |     | s, aniseed |     |     |     |     |     |     |     |     |     |     |     |     |     |     |     |     |     |     |     |     |     |     |     |     |
|    |                         |                                 |      |     | flavor     |     |     |     |     |     |     |     |     |     |     |     |     |     |     |     |     |     |     |     |     |     |     |     |     |
| 12 | 2-Carene                | C <sub>10</sub> H <sub>16</sub> | 1004 |     |            | —   | —   | —   | 0.1 | 1.1 | 0.6 | —   | —   | —   | —   | —   | —   | 0.6 | 0.3 | 0.2 | 0.1 | —   | —   | —   | —   | —   | 0.1 | —   | —   |
|    |                         |                                 |      |     |            |     |     |     | 2   | 6   | 1   |     |     |     |     |     |     | 8   | 3   | 3   | 9   |     |     |     |     | 2   |     |     |     |
| 13 | (+)-4-Carene            | C <sub>10</sub> H <sub>16</sub> | 1004 |     |            | —   | —   | —   | —   | 0.2 | —   | —   | 0.1 | —   | —   | —   | —   | —   | —   | —   | —   | —   | —   | 0.4 | —   | 0.4 | —   | —   | 0.0 |
|    |                         |                                 |      |     |            |     |     |     |     | 3   |     |     | 2   |     |     |     |     |     |     |     |     |     |     | 4   |     | 6   |     | 9   |     |
| 14 | $\alpha$ -Terpinen      | C <sub>10</sub> H <sub>16</sub> | 1004 |     |            | 0.6 | 0.7 | 0.2 | 0.8 | —   | —   | 0.0 | —   | 0.6 | 0.5 | 0.9 | 0.7 | —   | —   | —   | —   | —   | 0.4 | 0.6 | 0.6 | 0.1 | —   | 0.7 | —   |
|    |                         |                                 |      |     |            | 5   | 7   | 9   | 8   |     |     | 6   |     | 0   | 3   | 1   | 9   |     |     |     |     | 2   | 8   | 3   | 0   |     | 1   |     |     |
| 15 | d-Limonene              | C <sub>10</sub> H <sub>16</sub> | 1013 | 200 | Fresh      | 19. | 22. | 15. | 14. | 29. | 14. | 22. | 13. | 17. | 14. | 14. | 20. | 11. | 19. | 18. | 10. | 13. | 11. | 19. | 14. | 16. | 15. | 15. | 16. |
|    |                         |                                 |      |     | citrus     | 78  | 97  | 29  | 71  | 38  | 46  | 85  | 95  | 27  | 91  | 09  | 67  | 23  | 17  | 81  | 77  | 34  | 37  | 11  | 91  | 11  | 05  | 12  | 29  |
|    |                         |                                 |      |     | Orange,    |     |     |     |     |     |     |     |     |     |     |     |     |     |     |     |     |     |     |     |     |     |     |     |     |
|    |                         |                                 |      |     | Mint       |     |     |     |     |     |     |     |     |     |     |     |     |     |     |     |     |     |     |     |     |     |     |     |     |
|    |                         |                                 |      |     | Flavors    |     |     |     |     |     |     |     |     |     |     |     |     |     |     |     |     |     |     |     |     |     |     |     |     |
| 16 | trans- $\beta$ -Ocimene | C <sub>10</sub> H <sub>16</sub> | 1018 |     |            | 0.2 | 0.2 | 0.2 | 0.3 | 0.9 | 0.2 | 0.1 | 0.2 | 0.1 | 0.1 | 0.2 | 0.2 | 0.2 | 0.1 | 0.3 | 0.4 | 0.2 | 0.2 | 0.1 | 0.2 | 0.4 | 0.2 | 0.2 | 0.2 |
|    |                         |                                 |      |     |            | 1   | 4   | 6   | 0   | 3   | 2   | 7   | 3   | 7   | 7   | 0   | 5   | 1   | 8   | 3   | 1   | 6   | 3   | 6   | 2   | 0   | 6   | 6   | 8   |
| 17 | $\beta$ -Ocimene        | C <sub>10</sub> H <sub>16</sub> | 1020 |     |            | 0.1 | 1.3 | —   | —   | 2.1 | 0.7 | 1.1 | 0.7 | —   | —   | 0.8 | 1.0 | 0.6 | 0.6 | 0.8 | —   | —   | 0.6 | 1.0 | 0.7 | 0.9 | 0.1 | —   | —   |
|    |                         |                                 |      |     |            | 4   | 4   |     |     | 3   | 3   | 7   | 8   |     |     | 6   | 8   | 2   | 2   | 1   |     |     | 9   | 4   | 0   | 9   | 2   |     |     |
| 18 | (Z)- $\beta$ -ocimene   | C <sub>10</sub> H <sub>16</sub> | 1023 |     |            | 0.9 | —   | 0.7 | 0.9 | —   | —   | —   | —   | 0.9 | 0.7 | 0.0 | —   | —   | —   | —   | 0.8 | 0.7 | —   | —   | —   | 0.0 | 0.8 | 0.8 | 1.0 |
|    |                         |                                 |      |     |            | 5   |     | 3   | 3   |     |     |     |     | 1   | 2   | 3   |     |     |     |     | 2   | 8   |     |     |     | 8   | 3   | 3   | 7   |
| 19 | $\gamma$ -Terpinene     | C <sub>10</sub> H <sub>16</sub> | 1027 |     |            | 0.9 | 1.0 | 0.8 | 1.3 | 1.5 | 0.9 | 1.1 | 1.0 | 0.9 | 0.8 | 1.1 | 1.1 | 1.1 | 1.0 | 0.7 | 0.6 | 0.6 | 0.8 | 0.8 | 1.0 | 1.1 | 0.9 | 0.9 | 0.8 |

|    |                                                 |                                 |      |     |                    | 0   | 5   | 6   | 7   | 8   | 1   | 8   | 6   | 6   | 1   | 6   | 2   | 9   | 2   | 9   | 2   | 3   | 8   | 3   | 6   | 1   | 4   | 0   | 4   |
|----|-------------------------------------------------|---------------------------------|------|-----|--------------------|-----|-----|-----|-----|-----|-----|-----|-----|-----|-----|-----|-----|-----|-----|-----|-----|-----|-----|-----|-----|-----|-----|-----|-----|
| 20 | Terpinolene                                     | C <sub>10</sub> H <sub>16</sub> | 1042 | 200 | lemony             | 0.4 | 0.5 | 0.3 | 0.4 | 0.8 | 0.3 | 1.2 | 1.1 | 0.5 | 0.4 | 0.3 | 0.5 | 0.4 | 0.3 | 0.3 | 0.2 | 0.6 | 0.2 | —   | 0.3 | 0.6 | 0.9 | 0.4 | 1.0 |
|    |                                                 |                                 |      |     | Taste              | 7   | 2   | 5   | 9   | 3   | 4   | 3   | 1   | 0   | 1   | 9   | 3   | 6   | 8   | 3   | 4   | 6   | 7   |     | 6   | 9   | 2   | 4   | 2   |
| 21 | α-Pyronene                                      | C <sub>10</sub> H <sub>16</sub> | 1068 |     |                    | —   | —   | —   | —   | —   | —   | —   | 0.0 | —   | —   | —   | —   | —   | —   | —   | —   | —   | —   | —   | —   | —   | —   | —   | —   |
|    |                                                 |                                 |      |     |                    |     |     |     |     |     |     |     | 9   |     |     |     |     |     |     |     |     |     |     |     |     |     |     |     |     |
| 22 | Alloocimene                                     | C <sub>10</sub> H <sub>16</sub> | 1068 |     |                    | 0.0 | 0.0 | 0.0 | 0.1 | 0.1 | 0.0 | 0.0 | —   | 0.0 | 0.0 | 0.0 | 0.0 | —   | —   | 0.1 | 0.1 | 0.1 | 0.0 | 0.0 | —   | 0.1 | 0.0 | —   | 0.1 |
|    |                                                 |                                 |      |     |                    | 7   | 7   | 9   | 0   | 7   | 9   | 5   |     | 8   | 6   | 7   | 8   |     |     | 7   | 8   | 0   | 9   | 7   |     | 1   | 9   |     | 0   |
| 23 | (±)-m-Mentha-<br>1,8-diene                      | C <sub>10</sub> H <sub>16</sub> | 1093 |     |                    | —   | —   | —   | —   | —   | 0.0 | 0.2 | —   | —   | 0.0 | 0.8 | 0.4 | —   | —   | —   | 0.8 | —   | —   | —   | 0.7 | 0.7 | 0.7 | 0.7 | —   |
|    |                                                 |                                 |      |     |                    |     |     |     |     |     | 6   | 9   |     |     | 4   | 0   | 5   |     |     |     |     | 3   |     |     | 9   | 9   | 6   | 9   |     |
| 24 | Ocimene                                         | C <sub>10</sub> H <sub>16</sub> | 1224 |     |                    | —   | —   | —   | —   | —   | —   | —   | 0.0 | 0.0 | —   | —   | 0.1 | —   | —   | 0.3 | —   | —   | —   | —   | —   | —   | —   | —   | —   |
|    |                                                 |                                 |      |     |                    |     |     |     |     |     |     |     | 4   | 7   |     |     | 2   |     |     | 1   |     |     |     |     |     |     |     |     |     |
| 25 | (+)-3-Carene                                    | C <sub>10</sub> H <sub>16</sub> | 1224 |     |                    | —   | —   | —   | 0.0 | —   | —   | —   | —   | —   | —   | —   | —   | —   | —   | —   | —   | —   | —   | —   | —   | —   | —   | —   | —   |
|    |                                                 |                                 |      |     |                    |     |     |     | 5   |     |     |     |     |     |     |     |     |     |     |     |     |     |     |     |     |     |     |     |     |
| 26 | 3-Carene                                        | C <sub>10</sub> H <sub>16</sub> | 1224 |     |                    | —   | —   | —   | —   | —   | —   | —   | —   | —   | —   | —   | —   | —   | —   | —   | —   | —   | —   | —   | —   | —   | —   | 0.0 | —   |
|    |                                                 |                                 |      |     |                    |     |     |     |     |     |     |     |     |     |     |     |     |     |     |     |     |     |     |     |     |     |     | 4   |     |
| 27 | (-)-γ-Elemene                                   | C <sub>15</sub> H <sub>24</sub> | 1263 |     |                    | —   | —   | 0.1 | 0.1 | —   | —   | —   | —   | —   | —   | 0.1 | —   | 0.1 | 0.1 | —   | —   | —   | —   | —   | —   | —   | —   | —   | —   |
|    |                                                 |                                 |      |     |                    |     |     | 7   | 2   |     |     |     |     |     |     | 8   |     | 6   | 4   |     |     |     |     |     |     |     |     |     |     |
| 28 | 2,5,6-Trimethyl-<br>1,3,6-heptatriene           | C <sub>10</sub> H <sub>16</sub> | 1263 |     |                    | —   | —   | —   | —   | —   | —   | —   | —   | —   | 0.3 | —   | —   | —   | —   | —   | —   | —   | —   | —   | —   | —   | —   | —   | —   |
|    |                                                 |                                 |      |     |                    |     |     |     |     |     |     |     |     |     | 2   |     |     |     |     |     |     |     |     |     |     |     |     |     |     |
| 29 | 1,5,5-Trimethyl-<br>6-methylene-<br>cyclohexene | C <sub>10</sub> H <sub>16</sub> | 1264 |     |                    | —   | —   | —   | —   | —   | —   | —   | —   | 0.2 | —   | —   | —   | —   | —   | 0.1 | —   | 0.3 | —   | —   | —   | 0.1 | —   | —   | 0.1 |
|    |                                                 |                                 |      |     |                    |     |     |     |     |     |     |     |     | 6   |     |     |     |     |     | 8   |     | 4   |     |     |     | 4   |     | 5   |     |
| 30 | α-Cubebene                                      | C <sub>15</sub> H <sub>24</sub> | 1270 |     |                    | —   | —   | —   | —   | —   | —   | —   | —   | 0.0 | —   | —   | 0.0 | —   | —   | —   | —   | —   | —   | —   | —   | —   | 0.0 | —   | 0.0 |
|    |                                                 |                                 |      |     |                    |     |     |     |     |     |     |     |     | 3   |     |     | 3   |     |     |     |     |     |     |     |     |     | 3   | 3   |     |
| 31 | α-Copaene                                       | C <sub>15</sub> H <sub>24</sub> | 1283 | 6   | With pine<br>Wood, | 0.0 | —   | —   | —   | 0.0 | —   | —   | 0.0 | 0.0 | —   | —   | —   | —   | —   | —   | —   | —   | 0.2 | —   | —   | —   | —   | —   | —   |
|    |                                                 |                                 |      |     |                    | 5   |     |     |     | 8   |     |     | 3   | 3   |     |     |     |     |     |     |     | 4   |     |     |     |     |     |     |     |

|    |                                     |                                 |      |    |            |     |     |     |     |     |     |     |     |     |     |     |     |     |     |     |     |     |     |     |     |     |     |     |     |  |  |
|----|-------------------------------------|---------------------------------|------|----|------------|-----|-----|-----|-----|-----|-----|-----|-----|-----|-----|-----|-----|-----|-----|-----|-----|-----|-----|-----|-----|-----|-----|-----|-----|--|--|
|    |                                     |                                 |      |    | turpentine |     |     |     |     |     |     |     |     |     |     |     |     |     |     |     |     |     |     |     |     |     |     |     |     |  |  |
|    |                                     |                                 |      |    | oil aroma  |     |     |     |     |     |     |     |     |     |     |     |     |     |     |     |     |     |     |     |     |     |     |     |     |  |  |
| 32 | Copaene                             | C <sub>15</sub> H <sub>24</sub> | 1284 | 6  | With pine  | —   | 0.0 | —   | —   | —   | —   | 0.0 | —   | —   | 0.0 | 0.0 | —   | —   | —   | —   | —   | —   | 0.0 | 0.0 | —   | 0.0 | —   | —   | —   |  |  |
|    |                                     |                                 |      |    | Wood,      | 3   |     |     |     |     | 3   |     |     | 4   | 3   |     |     |     |     |     |     | 3   | 3   |     | 3   |     |     |     |     |  |  |
|    |                                     |                                 |      |    | turpentine |     |     |     |     |     |     |     |     |     |     |     |     |     |     |     |     |     |     |     |     |     |     |     |     |  |  |
|    |                                     |                                 |      |    | oil aroma  |     |     |     |     |     |     |     |     |     |     |     |     |     |     |     |     |     |     |     |     |     |     |     |     |  |  |
| 33 | β-Elemen                            | C <sub>15</sub> H <sub>24</sub> | 1289 |    |            | 0.2 | 2.1 | 0.1 | 0.0 | 0.4 | —   | 0.1 | —   | 1.7 | 3.3 | —   | 0.1 | 0.1 | 0.1 | 0.7 | —   | 0.2 | 1.2 | 0.1 | —   | —   | —   | —   | —   |  |  |
|    |                                     |                                 |      |    |            | 5   | 4   | 5   | 5   | 3   |     | 3   |     | 2   | 4   |     | 4   | 3   | 0   | 5   |     | 1   | 7   | 8   |     |     |     |     |     |  |  |
| 34 | (-)-β-Elemene                       | C <sub>15</sub> H <sub>24</sub> | 1294 |    |            | 2.5 | —   | —   | —   | 4.9 | 0.7 | 1.6 | 0.4 | —   | —   | 0.2 | 1.3 | —   | —   | —   | 0.4 | 2.8 | —   | 1.9 | 0.4 | 0.2 | 0.2 | 0.3 | 0.2 |  |  |
|    |                                     |                                 |      |    |            | 0   |     |     |     | 5   | 3   | 7   | 2   |     |     | 2   | 6   |     |     |     | 6   | 9   |     | 0   | 3   | 8   | 8   | 6   | 9   |  |  |
| 35 | Caryophyllene                       | C <sub>15</sub> H <sub>24</sub> | 1406 | 64 | Pale lilac | 1.5 | 1.3 | 0.8 | 0.7 | 3.4 | 1.0 | 1.2 | 1.0 | 1.7 | 1.6 | 1.1 | 1.1 | 0.9 | 0.8 | 1.3 | 1.1 | 1.8 | 1.3 | 1.5 | 1.0 | 0.8 | 0.9 | 1.0 | 0.9 |  |  |
|    |                                     |                                 |      |    | Fragrant   | 6   | 1   | 2   | 1   | 3   | 5   | 4   | 5   | 0   | 6   | 1   | 6   | 4   | 6   | 6   | 6   | 0   | 2   | 6   | 7   | 6   | 7   | 5   | 2   |  |  |
| 36 | (-)-β-cubebene                      | C <sub>15</sub> H <sub>24</sub> | 1410 |    |            | 0.1 | 0.1 | —   | 0.0 | —   | —   | 0.0 | 0.0 | 0.1 | 0.2 | —   | —   | —   | —   | 0.0 | 0.0 | 0.1 | 0.1 | —   | 0.0 | 0.0 | 0.0 | 0.0 | —   |  |  |
|    |                                     |                                 |      |    |            | 3   | 0   |     | 5   |     |     | 9   | 9   | 2   | 1   |     |     |     |     | 9   | 9   | 4   | 2   |     | 8   | 8   | 8   | 9   |     |  |  |
| 37 | γ-Elemene                           | C <sub>15</sub> H <sub>24</sub> | 1412 |    |            | 0.1 | 0.0 | —   | 0.2 | 0.2 | —   | 0.0 | —   | —   | 0.1 | —   | 0.0 | —   | —   | —   | —   | 0.1 | 0.0 | 0.0 | —   | 0.4 | —   | 0.5 | —   |  |  |
|    |                                     |                                 |      |    |            | 0   | 8   |     | 4   | 0   |     | 6   |     |     | 1   |     | 6   |     |     |     |     | 1   | 8   | 8   |     | 5   |     | 1   |     |  |  |
| 38 | α-Guaiene                           | C <sub>15</sub> H <sub>24</sub> | 1414 |    |            | 0.0 | —   | —   | —   | —   | —   | —   | —   | 0.0 | —   | —   | —   | —   | —   | —   | —   | —   | —   | —   | —   | —   | —   | —   | —   |  |  |
|    |                                     |                                 |      |    |            | 4   |     |     |     |     |     |     |     | 5   |     |     |     |     |     |     |     |     |     |     |     |     |     |     |     |  |  |
| 39 | γ-Murolene                          | C <sub>15</sub> H <sub>24</sub> | 1416 |    |            | 0.3 | 0.0 | —   | 0.1 | 0.5 | —   | —   | 0.1 | —   | —   | 0.0 | —   | —   | —   | 0.1 | —   | 0.1 | —   | —   | —   | —   | 0.3 | 0.1 | 0.1 |  |  |
|    |                                     |                                 |      |    |            | 3   | 5   |     | 1   | 4   |     |     | 3   |     |     | 4   |     |     |     | 5   |     | 6   |     |     |     | 3   | 2   | 4   |     |  |  |
| 40 | Humulene                            | C <sub>15</sub> H <sub>24</sub> | 1420 |    |            | —   | —   | —   | —   | —   | —   | —   | —   | —   | —   | —   | —   | —   | 0.4 | —   | 0.7 | —   | —   | —   | 0.6 | 0.5 | —   | —   | —   |  |  |
|    |                                     |                                 |      |    |            |     |     |     |     |     |     |     |     |     |     |     |     |     |     | 1   |     | 5   |     |     | 4   | 4   |     |     |     |  |  |
| 41 | Z, Z, Z-1,5,9,9-tetramethyl-1,4,7,- | C <sub>15</sub> H <sub>24</sub> | 1420 |    |            | 0.5 | 0.4 | 0.4 | 0.3 | 1.1 | 0.5 | 0.3 | 0.6 | 0.6 | 0.5 | 0.6 | 0.3 | 0.3 | —   | 0.8 | —   | 0.6 | 0.6 | 0.5 | —   | —   | 0.5 | 0.5 | 0.5 |  |  |
|    |                                     |                                 |      |    |            | 2   | 2   | 3   | 3   | 9   | 5   | 7   | 5   | 7   | 5   | 0   | 9   | 6   |     | 3   |     | 1   | 6   | 9   |     |     | 2   | 6   | 3   |  |  |

[illegible]

[illegible]

[illegible]

|    |                                                    |                                 |      |     |                                                                                 |      |     |      |      |      |     |      |     |     |     |      |     |     |     |      |     |      |     |      |     |      |     |      |      |
|----|----------------------------------------------------|---------------------------------|------|-----|---------------------------------------------------------------------------------|------|-----|------|------|------|-----|------|-----|-----|-----|------|-----|-----|-----|------|-----|------|-----|------|-----|------|-----|------|------|
|    |                                                    | O                               |      |     | floral<br>scent<br>reminisce<br>nt of baby<br>kale and<br>lavender              | 26   | 76  | 85   | 90   | 81   | 83  | 21   | 45  | 55  | 47  | 95   | 23  | 83  | 41  | 81   | 79  | 23   | 52  | 43   | 18  | 33   | 66  | 83   | 19   |
| 72 | trans-1-Methyl-4-(1-methylethyl)-2-cyclohexen-1-ol | C <sub>10</sub> H <sub>18</sub> | 1063 |     |                                                                                 | —    | —   | —    | —    | —    | —   | —    | —   | —   | —   | 0.05 | —   | —   | —   | —    | —   | —    | —   | —    | —   | —    | —   | —    | 0.05 |
| 73 | (-)-4-Terpineol                                    | C <sub>10</sub> H <sub>18</sub> | 1091 |     |                                                                                 | 0.67 | —   | 0.08 | 1.34 | 0.25 | —   | 0.61 | —   | —   | —   | 1.88 | —   | —   | —   | 0.05 | —   | 0.71 | —   | 0.11 | —   | 0.11 | —   | 1.11 | 1.01 |
| 74 | Terpinen-4-ol                                      | C <sub>10</sub> H <sub>18</sub> | 1091 |     | warm<br><br>peppery<br>aroma,<br>lighter<br>earthy and<br>aged<br>wood<br>notes | 0.0  | 0.5 | 0.9  | 0.1  | 2.5  | 1.0 | —    | 1.4 | 1.1 | 0.8 | 0.1  | 1.1 | 1.3 | 1.2 | 1.1  | 1.1 | 0.0  | 1.0 | 0.8  | 1.6 | 1.1  | 1.3 | 0.1  | 0.1  |
|    |                                                    | O                               |      |     |                                                                                 | 6    | 4   | 8    | 3    | 4    | 6   |      | 9   | 8   | 4   | 8    | 2   | 7   | 5   | 5    | 9   | 9    | 5   | 9    | 1   | 2    | 2   | 0    | 4    |
| 75 | L-α-Terpineol                                      | C <sub>10</sub> H <sub>18</sub> | 1096 | 330 | clove<br>flavor                                                                 | 0.3  | 0.2 | —    | 0.0  | —    | —   | —    | —   | —   | —   | —    | —   | —   | —   | —    | —   | —    | 1.2 | —    | —   | —    | —   | —    | —    |
|    |                                                    | O                               |      |     |                                                                                 | 8    | 7   |      | 4    |      |     |      |     |     |     |      |     |     |     |      |     | 5    |     |      |     |      |     |      |      |
| 76 | α-Terpineol                                        | C <sub>10</sub> H <sub>18</sub> | 1096 | 340 | Strong<br>floral<br>Fragrance,                                                  | —    | —   | —    | 0.7  | 1.3  | 0.6 | —    | —   | 0.6 | 0.4 | —    | —   | —   | —   | 0.7  |     | 0.5  | —   | 0.6  | —   | —    | —   | —    | 0.7  |
|    |                                                    | O                               |      |     |                                                                                 |      |     |      | 0    | 7    | 9   |      |     | 1   | 4   |      |     |     | 1   |      | 5   |      | 6   |      |     |      |     | 3    |      |



[illegible]

|    |                                        |                                 |      | 9   |     |     |     |     |     |     |     |     |     |     |     |     |     |     |     |     |     |     |     |     |     |     |     |     |     |   |  |   |  |   |  |
|----|----------------------------------------|---------------------------------|------|-----|-----|-----|-----|-----|-----|-----|-----|-----|-----|-----|-----|-----|-----|-----|-----|-----|-----|-----|-----|-----|-----|-----|-----|-----|-----|---|--|---|--|---|--|
|    |                                        | O                               |      |     |     |     |     |     |     |     |     |     |     |     |     |     |     |     |     |     |     |     |     |     |     |     |     |     |     |   |  |   |  |   |  |
| 85 | Espatulenol                            | C <sub>15</sub> H <sub>26</sub> | 1484 | —   | —   | —   | —   | —   | —   | —   | —   | —   | —   | —   | —   | —   | —   | 0.0 | —   | —   | —   | —   | —   | —   | —   | —   | —   | —   | —   |   |  |   |  |   |  |
|    |                                        | O                               |      | 7   |     |     |     |     |     |     |     |     |     |     |     |     |     |     |     |     |     |     |     |     |     |     |     |     |     |   |  |   |  |   |  |
| 86 | Bulnesol                               | C <sub>15</sub> H <sub>26</sub> | 1606 | —   | —   | —   | —   | 0.0 | —   | —   | —   | —   | —   | —   | —   | —   | —   | —   | —   | —   | —   | —   | —   | —   | —   | —   | —   | —   | —   |   |  |   |  |   |  |
|    |                                        | O                               |      | 4   |     |     |     |     |     |     |     |     |     |     |     |     |     |     |     |     |     |     |     |     |     |     |     |     |     |   |  |   |  |   |  |
| 87 | γ-eudesmol                             | C <sub>15</sub> H <sub>26</sub> | 1610 | —   | —   | 0.0 | —   | 0.1 | —   | —   | 0.0 | —   | —   | —   | —   | —   | —   | —   | —   | —   | —   | —   | —   | —   | —   | —   | —   | —   | —   |   |  |   |  |   |  |
|    |                                        | O                               |      | 4   |     |     |     | 4   |     |     |     | 3   |     |     |     |     |     |     |     |     |     |     |     |     |     |     |     |     |     |   |  |   |  |   |  |
| 88 | 8-epi-γ-eudesmol                       | C <sub>15</sub> H <sub>26</sub> | 1610 | —   | —   | —   | —   | —   | —   | —   | —   | —   | 0.0 | —   | 0.0 | —   | —   | —   | —   | —   | —   | —   | —   | —   | —   | —   | 0.0 | —   | —   |   |  |   |  |   |  |
|    |                                        | O                               |      |     |     |     |     |     |     |     |     |     |     |     |     | 5   |     |     |     | 6   |     |     |     | 4   |     |     |     |     |     |   |  |   |  |   |  |
| 89 | (+)-γ-Eudesmol                         | C <sub>15</sub> H <sub>26</sub> | 1622 | —   | —   | —   | —   | —   | —   | 0.0 | —   | —   | 0.2 | —   | —   | —   | —   | —   | —   | —   | —   | —   | —   | —   | —   | —   | —   | —   | 0.0 |   |  |   |  |   |  |
|    |                                        | O                               |      |     |     |     |     |     |     |     |     |     |     |     |     | 6   |     |     |     | 3   |     |     |     | 4   |     |     |     |     |     |   |  |   |  |   |  |
| 90 | τ-Cadinol                              | C <sub>15</sub> H <sub>26</sub> | 1630 | 0.0 | 0.0 | —   | —   | 0.3 | —   | 0.0 | —   | —   | —   | —   | —   | —   | —   | —   | —   | —   | —   | —   | —   | —   | —   | —   | —   | —   | —   |   |  |   |  |   |  |
|    |                                        | O                               |      | 9   |     | 6   |     | 9   |     | 6   |     |     |     |     |     |     |     |     |     |     |     |     |     |     |     |     |     |     |     |   |  |   |  |   |  |
| 91 | β-Eudesmol                             | C <sub>15</sub> H <sub>26</sub> | 1636 | —   | 0.0 | —   | —   | —   | —   | —   | —   | —   | —   | —   | —   | —   | —   | —   | —   | —   | —   | 0.0 | —   | —   | —   | 0.0 | —   | —   | —   |   |  |   |  |   |  |
|    |                                        | O                               |      | 3   |     |     |     |     |     |     |     |     |     |     |     |     |     |     |     | 8   |     |     |     | 6   |     |     |     |     |     |   |  |   |  |   |  |
| 92 | α-Eudesmol                             | C <sub>15</sub> H <sub>26</sub> | 1637 | —   | —   | 0.1 | 0.1 | —   | 0.1 | —   | 0.2 | —   | —   | —   | —   | 0.2 | —   | —   | —   | —   | —   | 0.0 | —   | —   | 0.0 | —   | —   | 0.0 | —   |   |  |   |  |   |  |
|    |                                        | O                               |      | 6   |     |     |     | 0   |     | 9   |     | 2   |     | 6   |     |     |     |     |     |     |     | 8   |     |     |     | 5   |     |     |     |   |  |   |  |   |  |
| 93 | α-Cadinol                              | C <sub>15</sub> H <sub>26</sub> | 1638 | 0.1 | —   | —   | —   | 0.7 | —   | —   | —   | 0.2 | —   | —   | —   | —   | —   | 0.2 | 0.2 | 0.2 | 0.2 | 0.1 | —   | 0.1 | 0.1 | —   | 0.1 | 0.1 | —   |   |  |   |  |   |  |
|    |                                        | O                               |      | 9   |     | 6   |     |     |     | 1   |     |     |     |     |     |     |     | 0   |     |     |     | 7   |     | 4   |     | 6   |     | 9   |     | 5 |  | 6 |  | 6 |  |
| 94 | 2,2-Dimethyl-6-methylene-cyclohexanepr | C <sub>15</sub> H <sub>26</sub> | 1671 | —   | —   | —   | —   | —   | —   | —   | —   | 0.0 | —   | —   | —   | —   | —   | —   | —   | —   | —   | —   | —   | —   | —   | —   | —   | —   | —   |   |  |   |  |   |  |
|    | opanol                                 | O                               |      |     |     |     |     |     |     |     |     |     |     |     |     | 3   |     |     |     |     |     |     |     |     |     |     |     |     |     |   |  |   |  |   |  |
| 95 | Farnesol                               | C <sub>15</sub> H <sub>26</sub> | 1672 | —   | —   | —   | —   | —   | —   | —   | —   | —   | 0.0 | —   | —   | —   | —   | 0.0 | —   | 0.0 | —   | —   | —   | —   | —   | —   | —   | —   | —   |   |  |   |  |   |  |
|    |                                        | O                               |      |     |     |     |     |     |     |     |     |     |     |     |     | 1   |     |     |     | 2   |     |     |     | 2   |     |     |     |     |     |   |  |   |  |   |  |
| Σ  |                                        |                                 |      | 54. | 46. | 63. | 61. | 23. | 63. | 45. | 65. | 56. | 58. | 65. | 52. | 60. | 64. | 59. | 71. | 64. | 69. | 54. | 65. | 60. | 62. | 63. | 63. | 63. | 63. |   |  |   |  |   |  |

[illegible]

[illegible]

[illegible]

[illegible]

|     |                                |                                                   |      |    |                                         |     |     |     |     |     |     |     |     |     |     |     |     |     |     |     |     |     |     |     |     |     |     |     |     |
|-----|--------------------------------|---------------------------------------------------|------|----|-----------------------------------------|-----|-----|-----|-----|-----|-----|-----|-----|-----|-----|-----|-----|-----|-----|-----|-----|-----|-----|-----|-----|-----|-----|-----|-----|
| 126 | Terpinyl acetate               | C <sub>12</sub> H <sub>20</sub><br>O <sub>2</sub> | 1279 |    |                                         | 0.0 | —   | 0.0 | 0.0 | —   | 0.2 | —   | 0.0 | —   | —   | 0.0 | 0.0 | —   | —   | —   | 0.0 | 0.0 | 0.0 | —   | —   | 0.1 | 0.1 | 0.2 | 0.1 |
|     |                                |                                                   |      |    |                                         | 3   |     | 6   | 9   |     | 1   |     | 7   |     |     | 6   | 5   |     |     |     | 7   | 3   | 7   |     |     | 0   | 1   | 5   | 1   |
| 127 | (R)-lavandulyl acetate         | C <sub>12</sub> H <sub>20</sub><br>O <sub>2</sub> | 1279 |    |                                         | —   | —   | —   | —   | —   | —   | —   | —   | 0.0 | —   | —   | —   | —   | —   | —   | —   | —   | —   | —   | —   | —   | —   | —   | —   |
|     |                                |                                                   |      |    |                                         |     |     |     |     |     |     |     |     | 3   |     |     |     |     |     |     |     |     |     |     |     |     |     |     |     |
| 128 | lavandulyl acetate             | C <sub>12</sub> H <sub>20</sub><br>O <sub>2</sub> | 1290 |    |                                         | —   | —   | —   | —   | —   | —   | —   | 0.1 | —   | 0.0 | —   | —   | —   | —   | —   | —   | —   | 0.1 | —   | 0.1 | —   | —   | —   | —   |
|     |                                |                                                   |      |    |                                         |     |     |     |     |     |     |     | 3   |     | 9   |     |     |     |     |     |     | 8   |     | 1   |     |     |     |     |     |
| 129 | Geranyl acetate                | C <sub>12</sub> H <sub>20</sub><br>O <sub>2</sub> | 1290 | 9  | Aroma of rose, bergamot and lavender    | —   | —   | —   | 0.1 | —   | —   | —   | —   | —   | —   | —   | —   | —   | —   | —   | —   | —   | —   | —   | 0.1 | 0.1 | —   | 0.2 |     |
|     |                                |                                                   |      |    |                                         |     |     |     | 8   |     |     |     |     |     |     |     |     |     |     |     |     |     |     | 8   | 9   |     | 0   |     |     |
| 130 | Geranyl isobutyrate            | C <sub>14</sub> H <sub>2</sub><br>O <sub>2</sub>  | 1290 | 10 | Pale rose aroma and sweet apricot aroma | —   | —   | —   | —   | —   | —   | —   | —   | —   | —   | —   | —   | —   | 0.0 | 0.1 | —   | —   | —   | —   | —   | —   | —   | —   |     |
|     |                                |                                                   |      |    |                                         |     |     |     |     |     |     |     |     |     |     |     |     |     | 8   | 3   |     |     |     |     |     |     |     |     |     |
| 131 | Methyl (9E)-9-octadecenoate    | C <sub>19</sub> H <sub>36</sub><br>O <sub>2</sub> | 1675 |    |                                         | 0.0 | —   | 0.0 | —   | —   | —   | —   | —   | —   | —   | —   | —   | 0.0 | —   | —   | —   | —   | —   | —   | —   | —   | —   | —   |     |
|     |                                |                                                   |      |    |                                         | 3   |     | 6   |     |     |     |     |     |     |     |     | 8   |     |     |     |     |     |     |     |     |     |     |     |     |
| 132 | Methyl-14-methylpentadecanoate | C <sub>17</sub> H <sub>34</sub><br>O <sub>2</sub> | 1856 |    |                                         | 0.0 | —   | —   | —   | —   | —   | —   | —   | —   | —   | —   | —   | —   | —   | —   | —   | —   | —   | —   | —   | —   | —   | —   |     |
|     |                                |                                                   |      |    |                                         | 6   |     |     |     |     |     |     |     |     |     |     |     |     |     |     |     |     |     |     |     |     |     |     |     |
| 133 | Hexadecanoic acid methylester  | C <sub>17</sub> H <sub>34</sub><br>O <sub>2</sub> | 1856 |    |                                         | —   | 0.0 | 0.0 | 0.0 | 0.0 | 0.0 | 0.0 | 0.0 | 0.0 | 0.0 | —   | 0.1 | 0.0 | 0.0 | 0.0 | 0.0 | 0.0 | 0.0 | —   | 0.0 | 0.0 | 0.0 | 0.0 |     |
|     |                                |                                                   |      |    |                                         |     | 3   | 7   | 2   | 7   | 3   | 3   | 4   | 4   | 5   |     | 0   | 9   | 6   | 7   | 3   | 2   | 4   |     | 3   | 4   | 3   | 4   |     |
|     | Σ                              |                                                   |      |    |                                         | 0.1 | 0.1 | 0.2 | 0.2 | 0.2 | 0.3 | 0.0 | 0.3 | 0.0 | 0.1 | 0.2 | 0.0 | 0.1 | 0.0 | 0.2 | 0.2 | 0.0 | 0.3 | 0.0 | 0.1 | 0.3 | 0.4 | 0.3 | 0.4 |





[illegible]
