# Supplementary material for: Chemical Composition Variation in Essential Oil and Their Correlation with Climate Factors in Chinese Prickly Ash Peels (Zanthoxylum armatum DC.) from Different Habitats
Source: MDPI journal article supplement (doi:10.3390/molecules29061343), 2024-03-18
Supplement: s1 [file s1]

Table S3 Relative amounts of nine major flavor compounds in each sample.

| compound            | Z1   | Z2   | Z3   | Z4   | Z5   | Z6   | Z7   | Z8   | Z9   | Z10  | Z11  | Z12  | Z13  | Z14  | Z15  | Z16  | Z17  | Z18  | Z19  | Z20  | Z21  | Z22  | Z23  | Z24  |
|---------------------|------|------|------|------|------|------|------|------|------|------|------|------|------|------|------|------|------|------|------|------|------|------|------|------|
| Linalool            | 52.2 | 45.7 | 60.8 | 57.9 | 16.8 | 59.8 | 44.2 | 60.4 | 53.5 | 56.4 | 60.9 | 51.2 | 57.8 | 62.4 | 53.8 | 65.7 | 62.2 | 64.5 | 52.4 | 60.1 | 56.3 | 59.6 | 59.8 | 60.1 |
| d-                  | 6    | 6    | 5    |      | 1    | 3    | 1    | 5    | 5    | 7    | 5    | 3    | 3    | 1    | 1    | 9    | 3    | 2    | 3    | 8    | 3    | 6    | 3    | 9    |
| Limonene            | 19.7 | 22.9 | 15.2 | 14.7 | 29.3 | 14.4 | 22.8 | 13.9 | 17.2 | 14.9 | 14.0 | 20.6 | 11.2 | 19.1 | 18.8 | 10.7 | 13.3 | 11.3 | 19.1 | 14.9 | 16.1 | 15.0 | 15.1 | 16.2 |
|                     | 8    | 7    | 9    | 1    | 8    | 6    | 5    | 5    | 7    | 1    | 9    | 7    | 3    | 7    | 1    | 7    | 4    | 7    | 1    | 1    | 1    | 5    | 2    | 9    |
| Caryophyllene       | 1.56 | 1.31 | 0.82 | 0.71 | 3.43 | 1.05 | 1.24 | 1.05 | 1.7  | 1.66 | 1.11 | 1.16 | 0.94 | 0.86 | 1.36 | 1.16 | 1.8  | 1.32 | 1.56 | 1.07 | 0.86 | 0.97 | 1.05 | 0.92 |
| Decanal             | 0.07 | 0.06 | 0.07 | 0.05 | 0.13 | 0.05 | 0.15 | 0    | 0.04 | 0.06 | 0    | 0.08 | 0.15 | 0    | 0    | 0    | 0.04 | 0    | 0.04 | 0    | 0    | 0.06 | 0.04 | 0    |
| $\alpha$ -Copaene   | 0.05 | 0    | 0    | 0    | 0.08 | 0    | 0    | 0.03 | 0.03 | 0    | 0    | 0    | 0    | 0    | 0    | 0    | 0    | 0.24 | 0    | 0    | 0    | 0    | 0    | 0    |
| Dodecanal           | 0    | 0    | 0    | 0.02 | 0    | 0    | 0    | 0    | 0    | 0    | 0    | 0    | 0    | 0    | 0    | 0    | 0    | 0    | 0    | 0    | 0    | 0    | 0    | 0    |
| Methyl isocaproate  | 0    | 0.09 | 0    | 0    | 0    | 0    | 0    | 0    | 0    | 0    | 0    | 0    | 0    | 0    | 0    | 0    | 0    | 0    | 0    | 0    | 0    | 0    | 0    | 0    |
| Geranyl acetate     | 0    | 0    | 0    | 0.18 | 0    | 0    | 0    | 0    | 0    | 0    | 0    | 0    | 0    | 0    | 0    | 0    | 0    | 0    | 0    | 0    | 0.18 | 0.19 | 0    | 0.2  |
| Geranyl isobutyrate | 0    | 0    | 0    | 0    | 0    | 0    | 0    | 0    | 0    | 0    | 0    | 0    | 0    | 0    | 0.08 | 0.13 | 0    | 0    | 0    | 0    | 0    | 0    | 0    | 0    |
