# Supplementary material for: Chemical Composition Variation in Essential Oil and Their Correlation with Climate Factors in Chinese Prickly Ash Peels (Zanthoxylum armatum DC.) from Different Habitats
Source: MDPI journal article supplement (doi:10.3390/molecules29061343), 2024-03-18
Supplement: s1 [file s1]

Table S5 Climate data averaged over the last 5 years (2017-2022) for Chinese prickly ash producing areas in China.

| Place of origin (province,<br>city/state, county/district) | Mean annual<br>temperature<br>(MAT) (°C) | Mean annual<br>minimum<br>temperature<br>(MAMIT)<br>(°C) | Mean annual<br>maximum<br>temperature<br>(MAMAT)<br>(°C) | Mean<br>annual<br>humidity<br>(MAH)<br>(%) | Annual<br>precipitation<br>(AP) (mm) | Annual<br>sunshine<br>time (AST)<br>(h) | Mean<br>wind<br>speed<br>(MWS)<br>(m/s) |
|------------------------------------------------------------|------------------------------------------|----------------------------------------------------------|----------------------------------------------------------|--------------------------------------------|--------------------------------------|-----------------------------------------|-----------------------------------------|
| Sichuan, Ya'an, Tianquan                                   | 16.9                                     | 13.6                                                     | 22.3                                                     | 84.0                                       | 1796.5                               | 850.0                                   | 1.2                                     |
| Sichuan, Ya'an, Yucheng                                    | 17.6                                     | 14.6                                                     | 22.7                                                     | 71.0                                       | 837.5                                | 980.6                                   | 2.2                                     |
| District                                                   |                                          |                                                          |                                                          |                                            |                                      |                                         |                                         |
| Sichuan, Liangshan, Jinyang                                | 18.3                                     | 14.7                                                     | 24.3                                                     | 68                                         | 707                                  | 1328.8                                  | 1                                       |
| Sichuan, Meishan, Hongya                                   | 18.8                                     | 15.5                                                     | 23.5                                                     | 79                                         | 1671.1                               | 964.7                                   | 2.1                                     |
| Sichuan, Meishan, Renshou                                  | 20.3                                     | 17                                                       | 24.9                                                     | 75                                         | 1094.3                               | 934.2                                   | 1.4                                     |
| Sichuan, Chengdu, Jintang                                  | 19.4                                     | 16                                                       | 24.4                                                     | 77                                         | 1314.4                               | 957.8                                   | 1.8                                     |
| Sichuan, Zigong, Yantan                                    | 20.5                                     | 17.2                                                     | 26                                                       | 77                                         | 801.2                                | 1260.0                                  | 1.7                                     |
| District                                                   |                                          |                                                          |                                                          |                                            |                                      |                                         |                                         |
| Sichuan, Mianyang, Santai                                  | 19.3                                     | 15.6                                                     | 24.4                                                     | 72                                         | 942.5                                | 1179.8                                  | 1.9                                     |
| Sichuan, Zigong, Fushun                                    | 20.6                                     | 17.5                                                     | 25.2                                                     | 78                                         | 1007.7                               | 1174.2                                  | 1.7                                     |
| Sichuan, Guangyuan, Zhaohua District                       | 18.2                                     | 14                                                       | 24.1                                                     | 69                                         | 1046.2                               | 1389.1                                  | 1.3                                     |
| Sichuan, Guang'an, Qianfeng District                       | 19.4                                     | 16                                                       | 24.7                                                     | 80                                         | 918.7                                | 1225.9                                  | 1.3                                     |
| Sichuan, Guang'an, Yuechi                                  | 19.5                                     | 16.4                                                     | 23.9                                                     | 78                                         | 988.4                                | 1185.8                                  | 1.6                                     |
| Sichuan, Dazhou, Quxian                                    | 19.9                                     | 16.3                                                     | 25.3                                                     | 81                                         | 998.1                                | 1184.6                                  | 1.4                                     |
| Sichuan, Bazhong, Pingchang                                | 19.1                                     | 15.4                                                     | 25                                                       | 71                                         | 858.7                                | 1124.9                                  | 1.3                                     |
| Yunnan, Zhaotong, Yanshan                                  | 12.2                                     | 7.4                                                      | 16.4                                                     | 74                                         | 678.0                                | 1528.9                                  | 4.1                                     |
| Guizhou, Qianxinan, Zhenfeng                               | 16.8                                     | 14.3                                                     | 21.8                                                     | 79                                         | 1278.0                               | 1492.2                                  | 3.8                                     |
| Chongqing, Jiangjin                                        | 18.7                                     | 14.7                                                     | 21.2                                                     | 79                                         | 1022.0                               | 1123.0                                  | 3.6                                     |
