# Supplementary material for: Chemical Composition Variation in Essential Oil and Their Correlation with Climate Factors in Chinese Prickly Ash Peels (Zanthoxylum armatum DC.) from Different Habitats
Source: MDPI journal article supplement (doi:10.3390/molecules29061343), 2024-03-18
Supplement: s1 [file s1]

Table S4 Results of person correlation analysis between volatile components and climatic factors.

| Compound name       | Mean annual temperature (MAT) (°C) | Mean annual minimum temperature (MAMT) (°C) | Mean annual maximum temperature (MAMAT) (°C) | Mean annual humidity (MAH) (%) | Annual precipitation (AP) (mm) | Annual sunshine time (AST) (h) | Mean wind speed (MWS) (m/s) |
|---------------------|------------------------------------|---------------------------------------------|----------------------------------------------|--------------------------------|--------------------------------|--------------------------------|-----------------------------|
| Linalool            | 0.005                              | -0.010                                      | -0.027                                       | -0.059                         | -0.532**                       | 0.402                          | 0.084                       |
| d-Limonene          |                                    |                                             |                                              |                                |                                |                                | -                           |
|                     | -0.107                             | -0.094                                      | -0.034                                       | 0.007                          | 0.494*                         | -0.376                         | 0.075                       |
| Caryophyllene       | 0.183                              | 0.198                                       | 0.078                                        | 0.344                          | 0.532**                        | -0.405*                        | -                           |
|                     |                                    |                                             |                                              |                                |                                |                                | 0.082                       |
| Decanal             | -0.283                             | -0.222                                      | -0.164                                       | 0.003                          | 0.450*                         | -0.062                         | 0.079                       |
| $\alpha$ -Copaene   | 0.092                              | 0.129                                       | 0.027                                        | 0.225                          | 0.223                          | -0.143                         | -                           |
|                     |                                    |                                             |                                              |                                |                                |                                | 0.121                       |
| Dodecanal           | -0.046                             | -0.055                                      | 0.064                                        | -0.385                         | -0.249                         | 0.179                          | -                           |
|                     |                                    |                                             |                                              |                                |                                |                                | 0.218                       |
| Methyl isocaproate  | -0.130                             | -0.066                                      | -0.098                                       | -0.236                         | -0.147                         | -0.240                         | 0.044                       |
| Geranyl acetate     | 0.059                              | 0.005                                       | 0.252                                        | -0.582**                       | -0.340                         | -0.016                         | -                           |
|                     |                                    |                                             |                                              |                                |                                |                                | 0.360                       |
| Geranyl isobutyrate | 0.004                              | -0.077                                      | -0.350                                       | 0.227                          | -0.004                         | -0.096                         | 0.489                       |

\*Significant correlation at the 0.05 level (two-tailed).

\*\*Significant at the 0.01 level (two-tailed).
